# Supplementary material
Source: publisher figshare collection journal article supplement (https://acs.figshare.com/ndownloader/files/28906397)
Supplement: Supplementary file 1 [file 28906397]

## Supporting Information

### **The *Environmental Microbiology Minimum Information (EMMI)* Guidelines: qPCR and dPCR Quality and Reporting for Environmental Microbiology**

Mark A. Borchardt<sup>1\*</sup>, Alexandria B. Boehm<sup>2</sup>, Marc Salit<sup>3</sup>, Susan K. Spencer<sup>1</sup>, Krista R. Wigginton<sup>4</sup>, and Rachel T. Noble<sup>5</sup>

<sup>1</sup>Environmentally Integrated Dairy Management Research Unit, USDA Agricultural Research Service, Marshfield WI, USA

<sup>2</sup>Department of Civil and Environmental Engineering, Stanford University, Stanford CA, USA

<sup>3</sup>SLAC National Accelerator Laboratory, Stanford University, Stanford CA, USA

<sup>4</sup>Department of Civil and Environmental Engineering, University of Michigan, Ann Arbor MI, USA

<sup>5</sup>Institute for the Environment, University of North Carolina, Chapel Hill, NC, USA

\*Corresponding author: Mark A. Borchardt, USDA-ARS, 2615 Yellowstone Drive, Marshfield, WI, 54449 USA. Phone: 715-387-4943, Email: [Mark.Borchardt@usda.gov](mailto:Mark.Borchardt@usda.gov)

#### **Description of Supporting Information**

Systematic review methods

Table S1. Information extracted from 100 most recent papers in health-related environmental microbiology that used qPCR and dPCR

Dimensional analysis examples of unit conversions for qPCR or dPCR from instrument output to target concentration in sample

Fillable pdf checklist of reporting elements for publishing credible qPCR or dPCR analyses of microbial targets in environmental samples

## **Systematic Review Methods**

On 22 June 2020, we searched Web of Science Core Collection via iknowledge.com using the following search terms in a title search: (virus or \*virus or salmonella or campylobacter or “O157:H7” or “microbial source tracking” or Cryptosporidium or Giardia) AND (water or \*water or formite\* or fomes or surface\* or air). The search returned 10,549 publications. Starting with the most recent publication, we performed full text review of the publication to determine whether it (1) provided measurements of pathogens or microbial source tracking markers in water or on surfaces or in air using the molecular approach of real-time qPCR or dPCR (studies on RNA viruses that performed reverse transcription before qPCR or dPCR were included); the measurements had to be on matrices with endogenous (unseeded) target, (2) was in English, and (3) was peer reviewed. Using the most recent 100 papers that fit those inclusion criteria, we recorded whether the paper reported on various controls and methods that we deem essential for the interpretation of their results. The list of information extracted from each publication discussed in this paper is provided in Table S1. These 100 papers were published between 2015 and 2020. The distribution among those years is 14 in 2020, 23 in 2019, 24 in 2018, 18 in 2017, 10 in 2016, and 11 in 2015. Only 3 of the 100 papers used digital PCR and the rest used real-time quantitative PCR methods.

Table S1. Information extracted from 100 most recent papers in health-related environmental microbiology that used qPCR and dPCR.

| <b>Question</b>                                                                   | <b>Total w YES</b> | <b>Total N</b> | <b>% w YES</b> |
|-----------------------------------------------------------------------------------|--------------------|----------------|----------------|
| State that sampling recovery control was run?                                     | 33                 | 100            | 33%            |
| Report results of sampling recovery control                                       | 29                 | 100            | 29%            |
| State that sampling equipment negative control was run?                           | 10                 | 100            | 10%            |
| Report results of sampling equipment negative control?                            | 8                  | 100            | 8%             |
| Did the authors use an “elution step” (from a filter, for example)?               | 67                 | 100            | 67%            |
| If authors use an elution step, do they report using an elution positive control? | 21                 | 67             | 31%            |
| Report the results of an elution positive control?                                | 10                 | 67             | 15%            |
| State nucleic acid extraction negative controls were run?                         | 20                 | 100            | 20%            |
| Report results of extraction negative controls?                                   | 9                  | 100            | 9%             |
| State nucleic acid extraction positive control was run?                           | 38                 | 100            | 38%            |
| Report results of extraction positive controls?                                   | 17                 | 100            | 17%            |
| State reverse transcription (RT) inhibition control was run?                      | 36                 | 86             | 42%            |
| Report results of RT inhibition control?                                          | 26                 | 86             | 30%            |
| State PCR inhibition control was run?                                             | 43                 | 100            | 43%            |
| Report results of PCR inhibition control?                                         | 26                 | 100            | 26%            |
| State RT negative control (no template control) was run?                          | 31                 | 86             | 36%            |
| Report results of RT negative control?                                            | 11                 | 86             | 13%            |
| State RT positive control was run?                                                | 36                 | 86             | 42%            |
| Report results of RT positive control?                                            | 12                 | 86             | 14%            |
| State PCR negative control (no template control) was run?                         | 46                 | 100            | 46%            |
| Report results for PCR negative control?                                          | 13                 | 100            | 13%            |
| Report standards / reference positive control for PCR?                            | 59                 | 100            | 59%            |
| Report standard source?                                                           | 56                 | 100            | 56%            |
| Report standard quantification methods?                                           | 41                 | 98             | 42%            |
| Report standard curve slope? $R^2$ ?                                              | 26                 | 93             | 28%            |
| Report lowest standard measured?                                                  | 29                 | 94             | 31%            |
| Report Cq determination method?                                                   | 23                 | 97             | 24%            |
| Reported how Cq converted to reported concentrations?                             | 19                 | 96             | 20%            |

## Dimensional Analysis

### Examples of Unit Conversions for qPCR or dPCR from Instrument Output to Target Concentration in Sample

#### Environmental aqueous sample where the dimension is volume

##### DNA or one-step RNA targets:

$$\text{Target sample concentration} \left( \frac{gc}{mL \text{ sample}} \right) = \text{Instrument output} \left( \frac{gc}{\mu L \text{ rxn}} \right) \times \text{PCR rxn dilution} \left( \frac{\mu L \text{ rxn}}{\mu L \text{ NA extract added}} \right) \times \text{Extraction conc factor} \left( \frac{\mu L \text{ NA extract}}{\mu L \text{ sample concentrate extracted}} \right) \times$$

$$\text{Inhibition dilution factor} \left( \frac{\mu L \text{ NA extract diluted}}{\mu L \text{ NA extract}} \right) \times \text{Volume conversion factor } 1000 \left( \frac{\mu L}{mL} \right) \times \text{Sample conc factor} \left( \frac{mL \text{ sample concentrate}}{mL \text{ sample}} \right)$$

$$\text{When a two-step RT assay is performed the term PCR rxn dilution is substituted with: PCR Rxn dilution} \left( \frac{\mu L \text{ rxn}}{\mu L \text{ RT rxn (i.e., cDNA)}} \right) \times \text{RT dilution} \left( \frac{\mu L \text{ RT rxn}}{\mu L \text{ NA extract added}} \right)$$

When inhibition is absent the dilution factor equals 1.

#### Environmental solid sample where the dimension is mass

##### DNA or one-step RNA targets:

$$\text{Target sample concentration} \left( \frac{gc}{g \text{ sample}} \right) = \text{Instrument output} \left( \frac{gc}{\mu L \text{ rxn}} \right) \times \text{PCR rxn dilution} \left( \frac{\mu L \text{ rxn}}{\mu L \text{ NA extract added}} \right) \times \text{Inhibition dilution factor} \left( \frac{\mu L \text{ NA extract diluted}}{\mu L \text{ NA extract}} \right)$$

$$\times \text{Mass conversion factor } 1000 \left( \frac{mg}{g} \right) \times \text{Extraction factor} \left( \frac{\mu L \text{ NA extract}}{mg \text{ sample extracted}} \right)$$

$$\text{When a two-step RT assay is performed the term PCR rxn dilution is substituted with: PCR Rxn dilution} \left( \frac{\mu L \text{ rxn}}{\mu L \text{ RT rxn (i.e., cDNA)}} \right) \times \text{RT dilution} \left( \frac{\mu L \text{ RT rxn}}{\mu L \text{ NA extract added}} \right)$$

When inhibition is absent the dilution factor equals 1.

*gc* = gene copies

*rxn* = reaction

# Environmental Microbiology Minimum Information Checklist

## Study Description

Study:  
Date:  
Completed by:

| Environmental Sampling | Sample Treatment                   | Sample Reduction                   | Nucleic Acid Extraction | Reverse Transcription              | PCR Detection                                               | Analysis |
|------------------------|------------------------------------|------------------------------------|-------------------------|------------------------------------|-------------------------------------------------------------|----------|
|                        | <input type="checkbox"/> Performed | <input type="checkbox"/> Performed |                         | <input type="checkbox"/> Performed | <input type="checkbox"/> qPCR <input type="checkbox"/> dPCR |          |

## Control Checklist

|                         | Environmental Sampling   | Sample Treatment         | Sample Reduction         | Nucleic Acid Extraction  | Reverse Transcription    | PCR Detection            |                   |
|-------------------------|--------------------------|--------------------------|--------------------------|--------------------------|--------------------------|--------------------------|-------------------|
| Step performed          | <input type="checkbox"/> |                   |
| Step has control info   | <input type="checkbox"/> | Negative Controls |
| # control replicates    | <input type="checkbox"/> |                   |
| Control result reported | <input type="checkbox"/> |                   |
| Data handling reported  | <input type="checkbox"/> |                   |
| Control introduced      | <input type="checkbox"/> | Positive Controls |
| Internal/External       |                          |                          |                          |                          |                          |                          |                   |
| Independent/Parallel    |                          |                          |                          |                          |                          |                          |                   |
| Step has control info   | <input type="checkbox"/> |                   |
| # control replicates    | <input type="checkbox"/> |                   |
| Control result reported | <input type="checkbox"/> |                   |
| Data Handling reported  | <input type="checkbox"/> |                   |

## Process Checklist

### Environmental Sampling

- ☐ Sampling Procedure
- ☐ Number of samples
- ☐ Sample amount, mean, range
- ☐ Sampling locations, dates, times

### Sample Treatment

- ☐ Performed
- ☐ Treatment procedure
- ☐ Reagents

### Sample Reduction

- ☐ Performed
- ☐ Reduction procedure
- ☐ Reagents
- ☐ Concentration Factor

### Nucleic Acid Extraction

- ☐ Extraction procedure
- ☐ Amount extracted, amount obtained
- ☐ Extract storage conditions

### qPCR or dPCR

- ☐ Target gene name, amplicon length
  - ☐ Thermocycling temperatures and times
  - ☐ Master mix: composition, vendors, concentrations
  - ☐ Additives: vendors, concentrations
  - ☐ Template amount added, pre-treatment (if any)
  - ☐ Primers: sequences, concentrations, vendors, references
- ☐ Amplicon confirmation method (probe, melt curve, etc)
  - ☐ Probe sequence, concentration, vendor, reference
  - ☐ Instrumentation
  - ☐ Equivalent volume of sample analyzed by PCR
  - ☐ Inhibition assessment procedure
  - ☐ Inhibition control description (if used)
  - ☐ Number samples tested and found inhibited

### Reverse Transcription

- ☐ Performed
- ☐ One or two step
- ☐ cDNA storage conditions (if two step)
- ☐ Reaction temperatures and times
- ☐ Reaction reagents and concentrations
- ☐ Priming method
- ☐ Reaction volume, added template amount
- ☐ Inhibition assessment procedure
- ☐ Inhibition control description (if used)
- ☐ Number samples tested and found inhibited

### Analysis – dPCR

- ☐ Threshold settings
- ☐ Technical replicates, number, well merging
- ☐ Partitions measured, number, mean, variance
- ☐ Partition volume
- ☐ Target copies per partition, mean, variance
- ☐ Program used for dPCR analysis
- ☐ Explanation of control results, example plots

### Analysis – qPCR

- ☐ Method for handling failed negative controls
- ☐ Technical replicates, number, calculations
- ☐ Calibration standards: description and source
- ☐ Method of quantifying standards
- ☐ Calibration curve slope
- ☐ Calibration curve R2
- ☐ Lowest standard measured or 95% LOD
- ☐ Cq value determination method
